# Supplementary material
Source: PubMed Central journal article supplement (PMC3000975)
Supplement: supp_M110.166462_Supplement-Fig.1.pdf [file supp_M110.166462_Supplement-Fig.1.pdf]

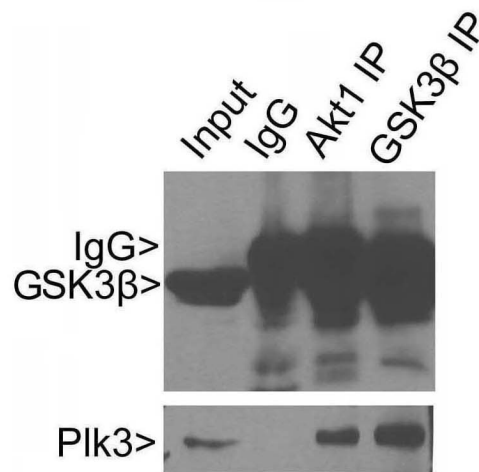

Equal amounts of A549 cell lysates were precipitated with Akt1 or GSK3 $\beta$  IgG (or with control IgG). Immunoprecipitates were washed and blotted, along with the lysate input, for GSK3 $\beta$  or PI3K.
